1 **Title**

2 Signatures of insecticide selection in the genome of *Drosophila melanogaster*.

3 **Running title**

4 Signatures of insecticide selection

5 **Authors**

6 David Duneau<sup>1,†,‡</sup>, Haina Sun<sup>2,†</sup>, Jonathan Revah<sup>2</sup>, Keri San Miguel<sup>2</sup>, Henry D. Kunerth<sup>3</sup>, Ian V.  
7 Caldas<sup>3</sup>, Philipp W. Messer<sup>3</sup>, Jeffrey G. Scott<sup>2\*</sup>, Nicolas Buchon<sup>2,4\*,‡</sup>

8

9 **Addresses**

10 <sup>1</sup> Université Toulouse 3 Paul Sabatier, CNRS, ENSFEA; UMR5174 EDB (Laboratoire Évolution  
11 & Diversité Biologique); Toulouse, France.

12 <sup>2</sup> Department of Entomology, Cornell University, Ithaca, NY 14853, USA

13 <sup>3</sup> Department of Biological Statistics and Computational Biology, Cornell University, Ithaca, NY,  
14 14853, USA.

15 <sup>4</sup> Cornell Institute for Host Microbe Interactions and Disease, Department of Entomology, Cornell  
16 University, Ithaca, NY 14853, USA.

17

18 † contributed equally.

19 \* contributed equally.

20 ‡ Corresponding authors:

21 David Duneau. Université Toulouse 3 Paul Sabatier, CNRS, ENSFEA; UMR5174 EDB  
22 (Laboratoire Évolution & Diversité Biologique); Toulouse, France. 0033561556759

23 Nicolas Buchon. Department of Entomology, Cornell University, Ithaca, NY 14853, USA. (607)  
24 280-1616

25

26 **Keywords:** *Drosophila*, insecticide resistance, evolution, GWAS, DGRP, pyrethroid,  
27 organophosphate.

## 28 **Abstract**

29 Resistance to insecticides has evolved in multiple insect species, leading to increased application  
30 rates and even control failures. Understanding the genetic basis of insecticide resistance is  
31 fundamental for mitigating its impact on crop production and disease control. We performed a  
32 GWAS approach with the *Drosophila* Genetic Reference Panel (DGRP) to identify the mutations  
33 involved in resistance to two widely used classes of insecticides: organophosphates (OPs,  
34 parathion) and pyrethroids (deltamethrin). Most variation in parathion resistance was associated  
35 with mutations in the target gene *Ace*, while most variation in deltamethrin resistance was  
36 associated with mutations in *Cyp6a23*, a gene encoding a detoxification enzyme never previously  
37 associated with resistance. A “nested GWAS” further revealed the contribution of other loci:  
38 *Dscam1* and *trpl* were implicated in resistance to parathion, but only in lines lacking *Wolbachia*.  
39 *Cyp6a17*, the paralogous gene of *Cyp6a23*, and *CG7627*, an ATP-binding cassette transporter,  
40 were implicated in deltamethrin resistance. We observed signatures of recent selective sweeps at  
41 all of these resistance loci and confirmed that the soft sweep at *Ace* is indeed driven by the  
42 identified resistance mutations. Analysis of allele frequencies in additional population samples  
43 revealed that most resistance mutations are segregating across the globe, but that frequencies can  
44 vary substantially among populations. Altogether, our data reveal that the widely used OP and  
45 pyrethroid insecticides imposed a strong selection pressure on natural insect populations.  
46 However, it remains unclear why, in *Drosophila*, resistance evolved due to changes in the target  
47 site for OPs, but due to a detoxification enzyme for pyrethroids.

48 **Article summary**

49 Insecticides are widely used to control pests and insect vectors of disease. In response to the strong  
50 selection pressure exerted by insecticides, resistance has evolved in most insect species. We  
51 identified few genes present in several *Drosophila melanogaster* natural populations implicated in  
52 the evolution of resistance against two insecticides widely used today. We identified primary and  
53 secondary genes involved in the resistance. Surprisingly, resistance evolved in the target site for  
54 one insecticide, but was associated to changes in a novel detoxification enzyme for the other  
55 insecticide.

## 56 **Introduction**

57 Insecticides are widely used for control of agricultural and structural pests, and to control insect  
58 vectors of disease. It is difficult, or perhaps impossible, to exactly calculate the economic and  
59 human health benefits associated with insecticide use, but they are significant. For example,  
60 depending on the crop and level of insect pressure present in a given year, insecticides can boost  
61 yields by 6-79% (Ware and Whitacre 2004). In just the USA, insecticide expenditures are >\$6  
62 billion and >550 million pounds are used annually (Meister and Sine 2014). In response to the  
63 strong selection pressure exerted by insecticides, resistance has evolved in multiple species against  
64 numerous insecticides. This can lead to increasing frequency of insecticide applications, increased  
65 application rates and even control failures; impacting both crop production and control of human  
66 (and animal) diseases. Thus, understanding the genetic basis underpinning the evolution of  
67 resistance to insecticides is of fundamental importance.

68 For more than twenty years, the availability of molecular tools has facilitated the  
69 identification of mutations responsible for changes in protein structure and also in gene expression  
70 causing insecticide resistance. Out of necessity these studies were usually carried out on strains  
71 that had been selected in the laboratory, in an effort to make the resistance gene(s) homozygous.  
72 Identification of the mutations responsible for resistance allowed for the frequency of these  
73 mutations to be examined in field populations. In the postgenomic era, Genome-Wide Association  
74 Studies (GWAS) offer the potential to examine how the evolution of insecticide resistance occurs  
75 at a whole genome level, without having to select a resistant strain in the laboratory. GWAS studies  
76 have been recently used to look at the pattern of resistance to a banned insecticide, (DDT, which  
77 has not been used in the USA since 1972), an organophosphate (OP, azinphos-methyl) and a  
78 neonicotinoid insecticide (imidacloprid) (Battlay *et al.* 2016; Schmidt *et al.* 2017; Denecke *et al.*

79 2017), but have not yet been used to evaluate resistance to insecticides that have been and continue  
80 to be widely used, such as pyrethroids.

81 OP and pyrethroid insecticides are widely used today. OPs were developed in the late 1940s  
82 and were the most widely used class of insecticides for more than three decades. Pyrethroid  
83 insecticides were commercialized in the 1980s and rapidly replaced OPs as the most widely used  
84 class of insecticides for about 20 years. A great deal has been learned about the basis of resistance  
85 to these two classes of insecticides. Mutations in the target site (*acetylcholinesterase* also known  
86 as *Ace* or *AChE* for OPs and *voltage sensitive sodium channel* or *Vssc* for pyrethroids) and  
87 increased detoxification by cytochrome P450s [CYPs] and esterases/hydrolases are the major  
88 mechanisms of resistance (Newcomb *et al.* 1997; Scott 1999, 2017; Gunning and Moores 2001;  
89 Kono and Tomita 2006; Achaleke *et al.* 2009; Dong *et al.* 2014). Resistance due to increased  
90 detoxification is most commonly due to increased expression of a gene, but non-synonymous  
91 mutations can cause resistance as well. Understanding the role of metabolism in insecticide  
92 poisoning has been less clearly resolved than target site mutations because there are multiple  
93 potential detoxification protein families (CYPs, GSTs, esterases/hydrolases, etc.) and each of these  
94 groups of proteins contains multiple genes (e.g. often >100 *Cyps*).

95 The aim of this study was to investigate the variation in resistance of individuals collected  
96 from a field population towards two classes of currently used insecticides in a natural population  
97 of *Drosophila melanogaster* using an unbiased approach able to reveal resistance loci (and  
98 candidate genes) in the whole genome. To this purpose, we performed GWAS using the  
99 *Drosophila* Genetic Reference Panel (DGRP), a panel of 205 lines of *D. melanogaster* mostly  
100 homozygous and fully sequenced and derived from a wild caught population (Mackay *et al.* 2012).  
101 The use of inbred fly lines allowed us to assess the impact of pesticides on distinct, but constant

102 genetic backgrounds to tease out the effect of the genotype from environmental effects. The  
103 association of a particular allele at a particular locus with the degree of resistance of each line to  
104 an insecticide allowed us to identify candidate genes belonging to the quantitative trait loci (QTL)  
105 underlying the resistance to those insecticides. Using an approach that first performed a GWAS  
106 with all the *Drosophila* lines of the panel followed by another GWAS including only the lines that  
107 did not carry the major effect allele (nested GWAS), we were able to identify and validate a set of  
108 genes of major and minor effect on resistance to OPs (parathion) and to pyrethroids (deltamethrin).  
109 These classes of insecticides were selected because they have been widely used for decades and  
110 are representatives of the 3<sup>rd</sup> and 2<sup>nd</sup> most widely used classes of insecticides today (OPs and  
111 pyrethroids, respectively). We thus expected these pesticides to have exerted significant selection  
112 pressure on *D. melanogaster*. Using other *Drosophila* genetic panels, we investigated the presence  
113 of our detected mutations in other natural populations and evaluated the signal of selection on our  
114 detected mutations.

115

## 116 **Materials and Methods**

### 117 **Fly stock and husbandry**

118 All *Drosophila* stocks were raised at 22°C on standard Cornmeal agar medium, with a relative  
119 humidity of 60%-70%, and a photoperiod of 12L:12D, unless specified. For the Genome Wide  
120 Association Study (GWAS), most of the isogenic lines of the *Drosophila* Genetic Reference Panel  
121 were used (193 lines were exposed to parathion and 191 to deltamethrin) (Mackay *et al.* 2012;  
122 Huang *et al.* 2014). To evaluate the involvement of candidate genes in resistance, *UAS*-controlled  
123 *in vivo* RNAi and overexpression experiments were performed using either the *Actin5c-Gal4*

124 driver (*Act5c-Gal4*) or the *da-Gal4; ubi-Gal80<sup>TS</sup>* conditional driver (*da-Gal4<sup>TS</sup>*). F<sub>1</sub> progeny was  
125 obtained by crossing virgin females (25 isolated within 8 h of emergence) of the driver strain with  
126 males (~15) of the *UAS-transgene* line. The F<sub>1</sub> progenies (for crosses with the *Gal4<sup>TS</sup> driver* >  
127 *UAS-transgene*) were raised at 18°C until three days after emergence, and then switched to 29°C  
128 for a week to trigger maximum transgene expression before being assayed for resistance to  
129 deltamethrin at 29°C. The F<sub>1</sub> progenies (for crosses with the *Act5c-Gal4 driver* > *UAS-transgene*)  
130 were raised and assayed for resistance at 25°C. As a control, the driver virgin females were crossed  
131 to the appropriate background lines *Attp2*, *Attp40* or *w<sup>1118</sup>* (see Table S1).

132 Thirty-three transgenic *Drosophila* lines and the appropriate background lines were  
133 obtained from the Bloomington *Drosophila* Stock Center (BDSC, Indiana University,  
134 Bloomington, IN, USA) and the Vienna *Drosophila* Ressource Center (VDRC) (Table S1). Three  
135 mutant lines, four transgenic *UAS-RNAi* lines and one overexpression line from the parathion  
136 candidate gene list were available for knockout, knockdown or overexpress of *trpl*, *olf413*, *fru* or  
137 *Dscam1* genes. One mutant line and nine transgenic *UAS-RNAi* lines from the deltamethrin  
138 candidate gene list were used for knockout of *Cyp6a17* or knockdown of *Cyp6a9*, *Cyp6a17*,  
139 *Cyp6a19*, *Cyp6a20*, *Cyp6a22*, *Cyp6a23*, *CG7627* and *tou*, respectively.

140

## 141 **Insecticides and bioassays**

142 The residual contact application method was used to examine the relative susceptibility of DGRP  
143 lines for the insecticides, parathion and deltamethrin. Parathion (99.3%, Chem Service, West  
144 Chester, PA, USA) and deltamethrin (100%, Roussel UCLAF, Paris, France) were each dissolved  
145 in acetone to final concentrations of 1.5 µg/ml and 0.7 µg/ml respectively. 0.5 ml insecticide  
146 solution was added to a 38.6 cm<sup>2</sup> scintillation vial (Wheaton Scientific, Millville, NJ, USA), which

147 was coated evenly on the inside surface using a hotdog roller machine (Gold Medal, Cincinnati,  
148 OH, USA) for 20 min under a fume hood until all the acetone had evaporated. Treated vials were  
149 incubated at 23°C for 20 hours before flies were transferred inside. Approximately 20 5-8 days old  
150 adult males for each line were assayed per vial for each insecticide. Vials were stoppered with a  
151 piece of cotton covered with a square of nylon tulle fabric and secured with a staple. The stopper  
152 was injected with 2 ml of 20% sugar water after addition of the flies, and assays were held at 25°C  
153 with a photoperiod 12L:12D. 1 ml of distilled H<sub>2</sub>O was added to the stoppers after 24 h. For  
154 GWAS, mortality was assessed at 2.5 h, 5 h, 11 h, 24 h, and 48 h after flies were added to each  
155 vial for parathion and at 48 h for deltamethrin. Ataxic flies were counted as dead and five separate  
156 experiments were conducted over five continuous weeks. For validation experiments, mortality  
157 was assessed 24 h after insecticide treatment. F<sub>1</sub> males (3-7-day-old) from each of the crosses were  
158 tested using single dose assays for parathion or deltamethrin.

159

## 160 **Genome wide association analysis.**

161 The genetic diversity of the DGRP lines comprises about 4 millions SNPs. However, the genotypic  
162 information for each line differs between loci (e.g. some loci have information for all lines, other  
163 do not), thus, sample sizes used in each association tested changes from a locus to another. Not all  
164 SNPs are therefore suitable for testing the association between the genetic variation at one locus  
165 and the resistance to insecticide. We selected SNPs for our association study based on 2 criteria:  
166 1- avoid a complete collinearity (possibly confounding) between alleles and *Wolbachia* status (i.e.  
167 we excluded cases where one allele corresponds to *Wolbachia* infection and the other to an  
168 uninfected status); 2- we had enough lines per treatment to run the model. Prior to each test, we  
169 therefore calculated a two-by-two matrix with *Wolbachia* status and allele identity (i.e. W<sup>+</sup>/allele1,



170 W<sup>-</sup>/allele1, W<sup>+</sup>/allele2, W<sup>-</sup>/allele2) summarizing the sum of lines for each category. We further  
171 included in our association only the SNPs where at least three of the categories had five lines. All  
172 the analyses were performed with custom made script.

173 We next estimated the significance of the alleles at each selected SNP for the survival of  
174 each line to parathion and deltamethrin. For parathion, we used a parametric survival analysis with  
175 a log-normal distribution of the error (Function Survreg from the R package “Survival”). The  
176 model was as following:  $\text{Surv}(\text{Hour\_of\_death}, \text{Censor}) \sim \text{Wolbachia status} * \text{SNP} + \text{frailty}$   
177  $(\text{Experiment}, \text{distribution}='gaussian') + \text{frailty}(\text{DGRP\_lines}, \text{distribution}='gaussian')$ . The variable  
178 “Experiment” and the identity of the lines were accounted for as random effect following a  
179 Gaussian distribution. For the second insecticide, deltamethrin, we tested with a linear regression  
180 based on a binomial distribution of the error (function GLMER from the R package “lme4”), the  
181 survival at 48h post-exposure of the individuals carrying each allele. We could not use a survival  
182 analysis because between 2.5h and 48h some ataxic individuals could recover (temporally) before  
183 eventually dying. Therefore, the model was as following:  $\text{cbind}(\text{Delta\_alive}, \text{Delta\_dead}) \sim$   
184  $\text{Wolbachia} + \text{SNP} + (1|\text{DGRP\_lines})$ . The identity of the lines was accounted for as a random effect  
185 following a Gaussian distribution. We compared this analysis to the analysis accounting for the  
186 variable “Experiment” as a random effect. The results were not strongly different but the approach  
187 including a random effect required much more computer time (month of analysis instead of days).  
188 Therefore, we performed our analyses without this term. To identify other genes responsible for  
189 the resistance in absence of major effect alleles, we performed a “Nested-GWAS” which consists  
190 in running the same analysis on the lines that are not 100% survival. In other words, we attempted  
191 to find the alleles responsible for the remaining variation.

192 Candidate SNPs were among the alleles where the p-value was below 0.0001. We then  
193 converted the positions provided for the version 5 of the *D. melanogaster* genome annotation in  
194 version 6 with the convert tool from Flybase. The effect and the characterization of the mutation's  
195 effect at each candidate SNP were provided using VEP from the website Ensembl  
196 (<http://www.ensembl.org/info/docs/tools/vep/index.html>). Candidates to be validated were chosen  
197 based on the shape of the peak in the Manhattan plot and the function provided by VEP (likelihood  
198 to be involved in the resistance). Then, those with a non-synonymous mutation were favored.

199 Validation of selected candidates were tested by exposing the genotypes and their control  
200 to the same conditions as in the GWAS. Differences of proportion of surviving individuals 48  
201 hours post exposure were statistically tested with a generalized linear model with a quasibinomial  
202 distribution of the error. We used a general linear hypothesis test (glht) with Tukey post Hoc  
203 pairwise comparisons ( $\alpha=0.05$ ), to ascertain differences between pairs of treatments (package  
204 *multcomp* in R).

205

## 206 **Correlation of resistance with gene expression and other phenotypes known in the DGRP** 207 **lines**

208 To determine whether the resistance to each of the insecticide correlated with resistance to other  
209 abiotic stress such as paraquat, starvation and ethanol, we used measurement from other studies  
210 (Mackay *et al.* 2012; Weber *et al.* 2012; Morozova *et al.* 2015) and assessed the correlation (of  
211 Spearman) with our proportion of survival to our insecticides 48h post-exposure. We also tested  
212 whether the constitutive expression of our genes involved in resistance correlated with the  
213 resistance to pesticide. Although this approach is very limited as both phenotypes were obtained  
214 in different laboratories, we used the constitutive gene expression of our genes from (Huang *et al.*

215 2015) to correlate (Spearman) it with the proportion of survival individuals 48 hours post-exposure  
216 to the insecticides.

217

## 218 **Population genetic analyses**

219 For the H12 selection scans and haplotype trees presented in Figure 4 we used VCF files from the  
220 DGRP 2 Freeze 2.0 calls (<http://dgrp2.gnets.ncsu.edu/data.html>). Only the lines that were included  
221 in the GWAS analysis were used. We further filtered out any site with more than 18% missing  
222 data. Indels were removed and the data was subset to biallelic sites. Missing data was imputed and  
223 remaining heterozygous sites were phased with Beagle 4.1, using windows of 50,000 sites and 15  
224 iterations per window (Browning and Browning 2016). Each autosomal arm was scanned using  
225 the H12 script obtained from the SelectionHapStats repository provided in (Garud *et al.* 2015),  
226 using window sizes of 800 segregating sites. We extracted 200 kilobase genomic windows  
227 centered on the *Ace* and *Cyp6a23* gene positions from the DGRP data, as well as from two random  
228 genomic regions not associated with GWAS hits. These windows contained between 6000 and  
229 8500 biallelic SNPs. For each window, we first calculated a distance matrix using the observed  
230 number of nucleotide differences in our filtered data set. From these distanced matrices we  
231 estimated neighbor-joining trees (Saitou and Nei 1987). At the *Ace* and *Cyp6a23* windows,  
232 individuals were classified according to presence (“1”) or absence (“0”) of individual insecticide  
233 resistance mutations (3R:13,243,332, 3R:13,243,686 and 3R:13,243,999 at *Ace*; 2R:14,876,125  
234 and 2R:14,876,857 at *Cyp6a23*). Trees were estimated and drawn using the R package ape (Paradis  
235 *et al.* 2004). The specific midpoints of the four windows used for the trees in Figure 4A and the  
236 number of SNPs in each window are: (i) 2L:17,403,824, 7722 SNPs; (ii) 2R:14,876,125, 7726  
237 SNPs; (iii) 3L:14,419,400, 8531 SNPs; (iv) 3R:19,817,445, 6141 SNPs.

238 Allele frequency estimates reported in Figure 4C were obtained from the same DGRP data  
239 set used for the H12 scans and haplotype trees, except that here we included indels because the  
240 resistant allele at CG7627 is a deletion. For the GDL lines, VCF files were obtained from the  
241 Clark Lab at Cornell University. Indel information was obtained from VCF files downloaded from  
242 the Poole Lab website (<http://www.johnpool.net/genomes.html>). The same 18% missing data filter  
243 was applied prior to imputation, and the remaining sites were again phased using Beagle 4.1, using  
244 windows of 50,000 sites and 15 iterations per window (Browning and Browning 2016).

#### 245 **Data availability**

246 *Drosophila* lines are listed in table S1 with their stock number. Raw phenotypic data and results  
247 from the GWAS are available in Supplemental Table S2, S3, S4, S5, S8 and S9.

248

## 249 **Results**

250 Our results indicate that the resistance to an OP and pyrethroid in the DGRP lines is largely due to  
251 a single major locus, that additional loci provide minor effects, and that these loci differ between  
252 parathion and deltamethrin. Most variation in parathion resistance is associated with mutations in  
253 *Ace*, the target site of OPs (and carbamates). Most variation in deltamethrin resistance is associated  
254 with *Cyp6a23*, a probable detoxification enzyme. Both major effect genes were found under  
255 selection and we identified traces of soft sweep around their loci. Importantly, the alleles of the  
256 major effect genes we identified were not a particularity of our sampled population but were found  
257 in two other wild-caught *D. melanogaster* populations present in the Global Diversity panel lines  
258 (Grenier *et al.* 2015). Our study, therefore, reveals the specific and conserved mechanisms of  
259 resistance to various insecticides. Nested GWAS with the lines that did not carry the alleles

260 responsible for the major effects allowed us to identify the lesser contribution of other genes in the  
261 genome. We identified and validated the involvement of *Down syndrome cell adhesion molecule*  
262 *1 (Dscam1)* and *transient receptor potential-like (trpl)* in the resistance to parathion, and of  
263 *Cyp6a17* and *CG7627*, an ATP-binding cassette transporter in the resistance to deltamethrin.

264

## 265 **Genetic variation in insecticide resistance**

266 To identify genes underlying natural variation in resistance to OPs and pyrethroids, we quantified  
267 the survival of DGRP lines to parathion and deltamethrin (194 lines for parathion and 195 for  
268 deltamethrin). Survival to parathion was monitored at 2.5 h, 5 h, 11 h, 24 h and 48 h post-exposure  
269 and the susceptibility of each line was estimated by comparing the time death took to happen  
270 among lines. For deltamethrin we could not monitor the time death took to happen because flies  
271 were ataxic early in the process but could sometimes recover before dying. Thus, we only  
272 monitored the proportion of dead individuals 48 h post-exposure (*i.e.* when ataxia was not a  
273 confounding effect anymore). The proportions of survival 48 h post-exposure were compared  
274 between lines for deltamethrin. We found striking and reproducible variation in the DGRP lines'  
275 survival to both insecticides (Figure 1A).

276 Before examining the loci linked to resistance we investigated the role of non-genetic  
277 causes of differences in survival between the DGRP lines. Approximately half of the DGRP lines  
278 carry the bacterial endosymbiont *Wolbachia*. Therefore, we evaluated the possible contribution of  
279 *Wolbachia* to insecticide susceptibility with the average survivorship at each time point (Figure  
280 S1). Infection with *Wolbachia* did not correlate with resistance to parathion (Figure S1A) nor to  
281 resistance to deltamethrin (Figure S1B). Because resistance to different abiotic stresses could have  
282 shared mechanisms, we tested the correlations between resistance to parathion or deltamethrin and

283 these stresses; namely the resistance to paraquat, starvation and ethanol that were measured in  
284 other studies (see details in methods, Figure S2). We did not detect any correlations with resistance  
285 to parathion. However, resistance to deltamethrin in our study correlated positively with both  
286 resistance to paraquat ( $r=0.18$ ,  $p\text{-value}= 0.02$ ) and resistance to starvation ( $r=0.25$ ,  $p\text{-value}=\$   
287  $0.0004$ ). Further studies would be needed to investigate these correlations, particularly because  
288 they were performed in different laboratories at different times. We next asked whether the  
289 variation we observed was due to genetic or environmental differences. The variation in insecticide  
290 resistance in our population was explained more by genetic variance than by environmental  
291 variance, with 88% heritability for sensitivity to parathion and 61% for deltamethrin (see Table 1).  
292 As DGRP lines show a high degree of genetic relatedness, it is possible that resistance to  
293 insecticides is an indirect consequence of physiological differences between lines. Thus, we next  
294 evaluated whether susceptibility to insecticide could be a secondary consequence to general  
295 physiological weakness of susceptible lines. To determine this, we compared the relative survival  
296 of individual DGRP lines to deltamethrin and parathion. The resistance to one insecticide was not  
297 correlated to the resistance to the other insecticide, suggesting that the determinants of resistance  
298 are not due to a simple resistance to stress and are specific to each insecticide (Figure 1B). In  
299 addition, individuals susceptible to insecticides were not more closely related among each other  
300 for either of the compounds tested (Figure S3).

301       Having ruled out non-genetic influences on survival to the insecticides, we next sought to  
302 identify the genetic determinants underlying variation in resistance to either parathion or  
303 deltamethrin. The ranked survival for parathion suggested a major allele effect due to the steep  
304 change in survival between lines (few lines are intermediates, Figure 1Ai). However, the smooth  
305 continuum in the ranking of survival to deltamethrin (*i.e.* from lines that had 0% to 100%

306 survivorship) suggested multiple loci could be involved in resistance (Figure 1Aii). We next  
307 estimated which loci could contribute to insecticide resistance by statistically associating mortality  
308 with the allelic polymorphism at each sequenced locus in the genome.

309

### 310 **Genetic basis of the variation in resistance to parathion.**

311 We first identified loci associated with resistance to parathion using GWAS. We tested the  
312 association of resistance to parathion with 1,784,231 SNPs/indels. In total, 44 loci were  
313 significantly associated (*i.e.*  $-\log_{10}(\text{p-value}) > 8$ ) with resistance to parathion (Figure 2), but other  
314 SNPs/indels, less strongly associated, could be considered as candidates (271 had  $-\log_{10}(\text{p-value})$   
315  $> 5$  and 787 had  $-\log_{10}(\text{p-value}) > 4$ ). The presumptive genetic alterations and consequences for  
316 the genes close to these SNPs/indels can be found in Table S2. Based on both the significance of  
317 the association (*i.e.* the peaks in the Manhattan plots, Figure 2) and the consequence of the genetic  
318 change associated with the SNPs/indels (priority to SNPs/indels altering protein structure or in  
319 introns/promoters based on prediction on the Ensembl website), we made a list of loci and built a  
320 list of genes likely to be involved in parathion resistance (black p-values in Figure S4). The most  
321 significant QTLs were located in *Ace* (Figure 2A). These QTLs were mapped to SNPs that generate  
322 non-synonymous mutations [F368Y in position 3R:13,243,332: Figure 2Bi); G303A in position  
323 3R:13,243,686: Figure S5A; I199V in position 3R:13,243,999: Figure S5B] in *Ace*. Previous work  
324 has shown these mutations confer resistance to organophosphates (Fournier *et al.* 1993). We  
325 therefore conclude that in the case of parathion resistance, variation in the target protein is  
326 responsible for most of the variation in resistance.

327         The dominant role of *Ace* SNPs in causing resistance to parathion presented the potential  
328 for this strong signal to mask other genes involved in resistance (e.g. those with a lower effect).

329 To identify these secondary loci associated with parathion resistance, we next performed a nested  
330 GWAS. For that purpose, we ran a new GWAS using only a subset of lines (n= 124) that did not  
331 carry the resistance allele for the most significant SNP (i.e. mutation F368Y in the *Ace* gene). This  
332 association was tested over 1,212,116 remaining SNPs/indels. Amongst those, we identified a list  
333 of candidates with the same criterion as above (grey p-values in Figure S4, Table S3). From this  
334 list, we selected four candidate genes based on the annotated function of the protein and the  
335 availability in stock centers of genetic tools to perform functional validation: *trpl* (Figure 2Bii)  
336 that encodes a non-selective cation channel, *olf413* that encodes a dopamine beta hydrolase, *fru*  
337 that encodes a key determinant of sex specific expression, and *Dscam1* (Figure 2Bii) that encodes  
338 a transmembrane receptor involved in neuron wiring. The mutations in the genes coding for  
339 *Dscam1* and *trpl* were only associated to an increase in resistance with lines not infected by  
340 *Wolbachia* [Figure 2Bii (*Dscam1*), Survival with lognormal distribution: interaction SNP and  
341 *Wolbachia*: deviance= 455.39, p< 0.0001; Figure 2Bii (*trpl*), Survival with lognormal distribution:  
342 interaction SNP and *Wolbachia*: deviance= 735.69, p< 0.0001]. This result suggests strongly that  
343 *Wolbachia* could have a direct role in the resistance to insecticides, but this effect depends on host  
344 genotype. Alternatively, it is possible that *Wolbachia*'s presence alters the activity of other  
345 unidentified genes involved in resistance. We next analyzed the impact of loss of function (null)  
346 alleles or RNAi knockdown of these candidate genes on the susceptibility to parathion. RNAi-  
347 mediated knock-down of *olf413* or *fru* expression did not result in any changes in survivorship,  
348 suggesting they are not involved in resistance to parathion (Figure 2C). However, both  
349 downregulation of *Dscam1* by RNAi and a null mutation of *Dscam1* confirmed its role in  
350 resistance to parathion (Figure 2C). Knock-down of *trpl* did not affect susceptibility to parathion,  
351 but upregulation of *trpl* strongly increased resistance to parathion (Figure 2C).



352 Overall, our results strongly suggest that *Ace*, *Dscam1* and *trpl* are important for resistance  
353 to parathion and are involved in the phenotypic variation between strains. A possible mechanism  
354 by which these genes could contribute to resistance would be due to changes in their constitutive  
355 expression. To test this, we took advantage of a previous study that measured the expression of  
356 transcripts genome-wide in the DGRP lines (Huang *et al.* 2015). There was no correlation between  
357 constitutive expression of *Ace*, *Dscam1* and *trpl* in the conditions of their study and our survival  
358 experiments (Figure S6A-C). Altogether, our data demonstrate that the genetic basis for the  
359 variation in resistance to parathion is multigenic, with a major effect due to non-synonymous  
360 mutations in *Ace* and secondary roles due to mutations in *Dscam1* and *trpl* that can be buffered by  
361 the presence of *Wolbachia*.

362

### 363 **Genetic basis of the variation in resistance to deltamethrin.**

364 Using the same strategy outlined above, we analyzed the association of 2,171,433 SNPs/indels  
365 with deltamethrin survival. In total, 6 loci were strongly significantly associated (*i.e.*  $-\log_{10}(\text{p-value}) > 8$ ) to resistance to deltamethrin at the 48h time point but other, less strongly associated,  
366 SNPs/indels could be considered as potential candidates (192 had  $-\log_{10}(\text{p-value}) > 5$  and 1066  
367 had  $-\log_{10}(\text{p-value}) > 4$ ) (Figure 3A, Figure S7, Table S4). Among the most significant, two non-  
368 synonymous mutations strongly associated with resistance to deltamethrin were mapped to  
369 *Cyp6a23* (Figure 3B, 2R:14,876,125; Figures S8A, 2R:14,876,857). The peak of association was  
370 detected in *Cyp6a23*. However, there are five other *Cyps* at this locus (Figure 3C) and few SNPs  
371 in non-coding or intergenic regions were significantly associated with resistance within this locus  
372 (Figure 3A inlet). Thus, we wanted to test the possibility that other *Cyps* in the locus might also  
373 be involved in resistance to deltamethrin (no missense SNPs/indels in any of the other *Cyps* of the  
374

375 locus were significantly associated to resistance, but the information of the SNPs/indels is  
376 incomplete). We therefore decided to test all six *Cyps* (*Cyp6a23*, *Cyp6a9*, *Cyp6a19*, *Cyp6a20*,  
377 *Cyp6a17* and *Cyp6a22*) using all the available RNAi lines against these *Cyp* genes and using the  
378 one null line (*Cyp6a17*) available. Knocking down *Cyp6a23* and *Cyp6a17* increased susceptibility  
379 of flies to deltamethrin (Figure 3Di). In contrast, but not so surprisingly (based on Figure 3A inlet),  
380 knocking down the other *Cyps* did not change the survival to deltamethrin in comparison to their  
381 genetic control (Figure 3Di; Figure 3Dii). We further confirmed the role of *Cyp6a17* in resistance  
382 to deltamethrin by using a null mutant (Figure 3Diii). These results imply that only two *Cyp* genes  
383 in that locus are involved in resistance to deltamethrin: *Cyp6a23* (major effect) and *Cyp6a17*  
384 (secondary effect), although we do not know whether there are any mutations in *Cyp6a17* that  
385 could provide resistance. Remarkably, these two neighboring genes are paralogous (Figure 3C)  
386 (*i.e.* two genes descend from a common ancestral DNA sequence and derive within one species)  
387 (Good *et al.* 2014) and reminds us of *Ace-1* and *Ace-2*, two homologous genes involved in  
388 insecticide resistance in mosquito species (Weill *et al.* 2002). *Cyp*-mediated resistance can occur  
389 through changes in gene expression (Liu and Scott 1998) or structural changes (Amichot *et al.*  
390 2004). Therefore, we next asked whether DGRP flies expressed different levels of *Cyp6a23* and  
391 *Cyp6a17*, and whether these expression levels correlated with resistance. The constitutive  
392 expression of *Cyp6a23* estimated in (Huang *et al.* 2015) did not correlate with a higher resistance  
393 to deltamethrin (Figure S6D). However, there was a strong positive correlation with the  
394 constitutive expression of *Cyp6a17*, consistent with our results (Figure S6E).

395 To identify secondary loci associated with deltamethrin resistance, we performed a nested  
396 GWAS using only a subset of lines (n= 147) that did not carry the resistance allele for the most  
397 significant SNP (*i.e.* in position of 2R:14,876,125 of *Cyp6a23*). The association was tested over

398 1,872,071 SNPs and we identified 11 SNPs/indels significantly associated ( $-\log_{10}(\text{p-value}) > 8$ ),  
399 142 with a  $-\log_{10}(\text{p-value}) > 5$  and 766 with a  $-\log_{10}(\text{p-value}) > 4$  with resistance against  
400 deltamethrin (Table S5). Among the significant SNPs/indels, an isolated indel with a high p-value  
401 ( $-\log_{10}(\text{p-value}) = 6.44$ , Figure S8B) was close and upstream from the gene *CG7627*, which  
402 appears to have ATPase activity and be involved in transmembrane movement of substances. Flies  
403 in which we downregulated the expression of *CG7627* by RNAi had a lower probability to die  
404 from the exposure to deltamethrin when compared to their control (Figure 3Dii), although the  
405 constitutive expression of this gene did not correlate with resistance (Figure S6F). We also tested  
406 the role of *toutatis* (*tou*) which interestingly was associated with resistance to deltamethrin in both  
407 the GWAS and nested GWAS (Figure S7) and is supposedly involved in nervous system  
408 development (Vanolst 2005). However, the knock-down of this gene by RNAi did not confirm a  
409 role of this gene in resistance (Figure 3Dii). This might not be surprising as the change associated  
410 to resistance was a synonymous mutation in an intronic region of the gene (Table S5).

411 Overall, we find that deltamethrin resistance is primarily due to non-synonymous  
412 mutations in *Cyp6a23* and increased expression of *Cyp6a17*. RNAi of *Cyp6a23* suggests this gene  
413 is capable of detoxifying deltamethrin, yet no correlation of *Cyp6a23* constitutive expression  
414 (estimated in Huang *et al.* 2015) and deltamethrin survival was found. RNAi and null strains  
415 suggest that *Cyp6a17* is capable of detoxifying deltamethrin and the constitutive expression  
416 estimated in (Huang *et al.* 2015) of *Cyp6a17* correlates with deltamethrin survival, yet the GWAS  
417 signal is not centered over *Cyp6a17*. We validated *CG7627* as having a secondary effect on  
418 survivorship.

419

## 420 **Loci associated with resistance to insecticides show signatures of positive selection**

421 We found that a small number of individual loci explain most of the variation in resistance across  
422 the DGRP lines for both parathion and deltamethrin, suggesting that these loci could have  
423 undergone recent positive selection. To test this hypothesis, we performed a genome-wide scan of  
424 the DGRP lines using the H12 statistic (Garud *et al.* 2015). This statistic estimates levels of  
425 haplotype homozygosity and has previously been shown to provide good power in detecting both  
426 hard and soft selective sweeps (Garud *et al.* 2015; Miles *et al.* 2016). A previous H12 scan of the  
427 DGRP has already detected a strong sweep signal at the *Ace* locus, as well as two other loci known  
428 to be associated with insecticide resistance (*ChKov1* and *Cyp6g1*) (Garud *et al.* 2015; Schmidt *et*  
429 *al.* 2017). Our genome-wide scan presented in Figure 4A confirms these signals and also reveals  
430 clear sweep signatures at all of the other key resistance loci identified in our GWAS analysis  
431 (*CG7627*, *Dscam1*, *trpl*, and *Cyp6a23/Cyp6a17*). Many of these signals rank among the most  
432 pronounced sweep signals detected genome-wide, suggesting that the evolution of pesticide  
433 resistance constitutes one of the strongest adaptive response experienced by *D. melanogaster* in  
434 its recent evolutionary history.

435

## 436 **Haplotypes at *Ace* are consistent with a soft selective sweep driven by resistance alleles.**

437 To demonstrate that the signals of positive selection we observed in the genome-wide H12 scan  
438 were indeed driven by the specific resistance mutations, rather than some other alleles, we studied  
439 patterns of haplotype diversity at several resistance loci using neighbor-joining trees (Figure 4A).  
440 The haplotype tree around *Ace*, which constituted the strongest signal in the H12 scan, showed  
441 clear signatures that the sweep patterns observed at this locus were indeed driven by the resistance  
442 mutations, as indicated by the presence of several independent clusters of resistance mutation-

443 carrying haplotypes with short genetic distances within clusters. Susceptible haplotypes, by  
444 contrast, showed patterns similar to the genomic background. In particular, we observed two  
445 distinct clusters of haplotypes carrying resistance mutations at all three sites (111). One of these  
446 clusters is located close to a cluster of haplotypes carrying only the third resistance mutation (001),  
447 suggesting a short evolutionary distance between these haplotypes. All haplotypes we observed in  
448 the DGRP that carried resistance mutations at two of the three sites (011 & 110) also fell in this  
449 group. This is consistent with a scenario in which these two-mutation haplotypes represent  
450 transition haplotypes to three-mutation haplotypes, or back-mutations. We observed several low-  
451 frequency haplotypes with only one resistance mutation (100, 010, and 001) that did not appear to  
452 cluster with any of the other resistance haplotypes, suggesting that these haplotypes arose  
453 independently from wildtype alleles, as has been proposed previously (Karasov *et al.* 2010).

454 To provide further evidence that the sweep signal at *Ace* is indeed driven by the resistance  
455 mutations, we split the DGRP lines into two subsamples, the first comprising the genomes that  
456 carry at least one of the three resistance mutations, and the second comprising those that do not  
457 carry any such mutation. We then estimated H12 independently in each subsample (after down-  
458 sampling the second sample to the same size as the first). Figure 4B shows that the H12 peak is  
459 only observed in the subsample with resistance mutations, whereas there is almost no such signal  
460 among the susceptible genomes. This again confirms that it is indeed the resistance mutations (or  
461 some very tightly linked mutations) that primarily drive the peak in the H12 signal around *Ace*.

462 At the *Cyp6a23/Cyp6a17* loci we also detected sweep signatures in our H12 scan, although  
463 these signals were much weaker than at the *Ace* locus. One possible explanation for this is that the  
464 *Cyp6a* locus has undergone a very soft sweep from standing variation, which is consistent with the  
465 fact that the haplotype tree at this locus does not show any noticeable clustering of resistance

466 alleles (Figure 4A). In addition, the resistance mutations are at very low frequency at the  
467 *Cyp6a23/Cyp6a17* locus in the DGRP data, limiting the extent of possible sweep signatures.

468

#### 469 **Global distribution of resistance allele frequencies.**

470 To study the global prevalence of the different resistance mutations identified in our GWAS we  
471 estimated their frequencies in the DGRP, as well as a panel of Global Diversity Lines (GDL)  
472 comprising fly strains from five different continents (Grenier *et al.* 2015). Figure 4C shows the  
473 frequencies of resistant (1) and susceptible (0) alleles — and combinations thereof at individual  
474 loci — for *Ace*, *Cyp6a23*, *Dscam1*, *trpl*, and *CG7627*, revealing substantial frequency variation  
475 between populations. For example, haplotypes with neither of the two resistance mutations at the  
476 *Cyp6a23* locus (00) constitute only ~22% of the strains from Tasmania, but ~74% of the DGRP  
477 strains. By contrast, fully resistant strains (11) constitute ~75% of the strains from Tasmania, yet  
478 only ~17% in the DGRP. These patterns could suggest that more intense pyrethroid selection has  
479 occurred in Tasmania compared to the rest of the world. Allele frequency differences are even  
480 more pronounced at *Ace*. Here, haplotypes with none of the three resistance mutations (000)  
481 comprise ~96% of the strains from Zimbabwe, but only ~37% of strains from Beijing, suggesting  
482 that the least intense organophosphate selection has occurred in the Zimbabwe population. Among  
483 the resistant haplotypes at *Ace*, there is also surprising variation in terms of the frequencies of  
484 individual resistance allele combinations. For instance, the most common combination of  
485 resistance alleles in the DGRP is 111 at ~32%. Most of the other possible configurations with one  
486 or two resistance mutations also occur, yet at much lower frequencies. In the Beijing sample,  
487 however, the most frequency resistant configuration is 010 at ~47%, with the three-mutation  
488 configuration (111) present in only ~3% of strains. This extensive diversity in resistant haplotypes

489 is consistent with a non-mutation-limited scenario in which individual resistance mutations can  
490 evolve rapidly and repeatedly at individual loci, such that even complex, multi-step adaptations  
491 can arise quickly with intermediate configurations not necessarily reaching high population  
492 frequency (Messer and Petrov 2013). This is also consistent with the possibility that different  
493 insecticides (carbamates and/or structurally different OPs) were used in different regions and that  
494 they are selecting for different mutations (Oppenoorth 1985).

495

## 496 **Discussion**

497 The evolutionary outcome from insecticide selection has proven to be extraordinarily difficult to  
498 predict and our results confirm this. We find that the results with deltamethrin were very  
499 unexpected, as no changes in the target site gene were found. This is in stark contrast to both how  
500 pyrethroid resistance has evolved in most insects, and to parathion where most of the resistance  
501 was conferred by *Ace* mutations. Furthermore, the genes identified and validated as having a  
502 secondary role in resistance to parathion or deltamethrin would not have been the ones that were  
503 expected based on previous resistance work. However, there were some consistencies between the  
504 parathion and deltamethrin results. The most notable part is that most of the resistance in both  
505 cases was primarily due to mutations at a single locus. The debate over whether insecticide  
506 resistance is most commonly monogenic or polygenic will not easily be resolved, as there are clear  
507 examples that both occur. Our data suggest that resistance to parathion and deltamethrin in the  
508 DGRP lines are polygenic, but that a single locus confers most of the resistance.

509 Much of the work on insecticide resistance has focused on changes in target site or  
510 detoxification genes, in part for historical reasons. However, identification of other genes that can

511 be involved in resistance has been very challenging. GWAS studies like what we did have the  
512 potential to identify toxicologically relevant genes that would otherwise be very difficult to  
513 identify. For example, our studies implicate *Dscam1* and *trpl* in parathion resistance and *CG7627*  
514 in resistance to deltamethrin. Based on what is known about these genes it is difficult to provide a  
515 physiological or toxicological explanation for their role. However, these are exciting genes for  
516 further investigations that could greatly improve our understanding of the poisoning process in  
517 insects. The former, the *Down syndrome cell adhesion molecule 1 (Dscam1)* is known for its  
518 involvement in self-avoidance mechanisms that are key during neurogenesis. It is not entirely  
519 surprising that it plays a role in the resistance against an insecticide that disrupts the nervous  
520 system. The later, *CG7627*, is known to be involved in membrane transport. We do not know much  
521 about this gene, but other proteins that are capable of transporting xenobiotics can alter the toxicity  
522 of insecticides (Sun *et al.* 2017). Most genetic variance for resistance relies on genes with a major  
523 effect, however, other genes clearly play a significant role.

524 Surprisingly, the genetics of resistance can be altered by the presence of *Wolbachia*.  
525 Beyond the fact that GWAS generally ignores the epistatic effect among genes, our study reveals  
526 clearly that the effect of resistant alleles can depend on *Wolbachia* infection. *Wolbachia* density  
527 can correlate positively with the presence of insecticide-resistant genes in mosquitoes (Berticat *et*  
528 *al.* 2002), however, it seems that the pleiotropic effect of *Wolbachia* on resistance alleles can have  
529 a major influence on the efficiency of the resistance, as it is the case for *Dscam1* and *trpl*. This  
530 implies that *Wolbachia* could be a buffer to the effect of resistance alleles and prevent them from  
531 fixation.

532 Fruit production relies heavily on the use of insecticides. As such, *D. melanogaster* is  
533 expected to be under a strong selection pressure to develop resistance. Our results confirm this



534 happening in the field, particularly for OPs and pyrethroids which were used in the decades  
535 preceding the collection of the DGRP lines. We selected parathion and deltamethrin as our  
536 prototypical OP and pyrethroid, respectively. However, what we observed in the DGRP lines is  
537 not necessarily the result of exclusive selection with parathion or deltamethrin, but rather the  
538 combined results of all OPs (and carbamates) and pyrethroids. This is important simply to prevent  
539 over-interpretation of our results. For example, the mutations in *Ace* that resulted in parathion  
540 resistance in the DGRP lines are likely the result of cumulative selection with multiple OPs (and  
541 carbamates), not necessarily the result of selection only with parathion. Conversely, *Cyp6a23* is  
542 not involved in resistance to DDT, nitenpyram, dicyclanil nor diazinon (Daborn *et al.* 2007), but  
543 the selection on this gene could be due to pyrethroids other than deltamethrin.

544         While it is remarkable that the GWAS analysis for both insecticides identified a single  
545 locus, it is curious that in one case variation in toxicity was linked to mutations in the target site  
546 gene (*Ace* for parathion), but not for the other (*Vssc* for deltamethrin). This is not limited to the  
547 DGRP lines as evaluation of the Global Diversity Lines also showed that mutation in *Vssc* was not  
548 present. This makes *D. melanogaster* quite unusual as *Vssc* mutations are very common in pest  
549 species and have been found in at least one strain from virtually every pyrethroid/DDT resistant  
550 species examined (Dong *et al.* 2014). One possibility would be if there was a codon usage in *D.*  
551 *melanogaster*, such that the resistance mutation could not occur with a single nucleotide change.  
552 This has been proposed as a reason why organophosphate and carbamate insecticides had not  
553 selected for the G119S mutation in *Ace* in *Aedes aegypti* (Weill *et al.* 2004). The most common  
554 *Vssc* mutation is L1014/F/H/S/C/W (house fly numbering system) (Scott *et al.* 2013). The codon  
555 used by *D. melanogaster* at this position is CTT (same as house fly). Thus, a single nucleotide  
556 change could produce known resistance mutations at this position. Similarly, the T929I mutation

557 can also confer pyrethroid resistance (Dong *et al.* 2014) and the codon at this position in *D.*  
558 *melanogaster* could accommodate this change with a single nucleotide mutation (from ACA to  
559 ATA). However ethyl methanesulfonate (EMS) mutagenesis led to the recovery of *para* (the *D.*  
560 *melanogaster* *Vssc*) mutants that were up to 22-fold resistant to DDT, and up to 10-fold resistant  
561 to deltamethrin (Pittendrigh *et al.* 1997) and recently the I265N *para* mutation was found to confer  
562 6.3-fold resistance to deltamethrin (Rinkevich *et al.* 2015). In contrast, permethrin selection of  
563 wild caught *D. melanogaster* failed to generate a resistant strain (R. Roush, personal  
564 communication), although cyclodiene selection of the same populations was highly successful  
565 (ffrench-Constant *et al.* 1990). Thus, under laboratory conditions *para* mutations can be made that  
566 result in insensitivity to pyrethroids (and DDT), but such mutations do not appear to underlie  
567 resistance in field populations of *D. melanogaster* (based on the DGRP and GDL lines and  
568 laboratory selections of field populations). It is difficult to reconcile why selection favored changes  
569 in a target site for OPs and yet favored changes in a detoxification gene for pyrethroids.

570 Our results provide an interesting comparison to the three other papers that have evaluated  
571 the DGRP lines to look for loci associated with resistance to DDT, azinphos-methyl and  
572 imidacloprid (Battlay *et al.* 2016; Schmidt *et al.* 2017; Denecke *et al.* 2017). Most striking is that  
573 different genes are responsible for azinphos-methyl and parathion, even though both are OPs. The  
574 major gene associated with azinphos-methyl resistance was *Cyp6g1* with a secondary effect seen  
575 for *CHKov1* (Battlay *et al.* 2016). In contrast, the major gene associated with parathion resistance  
576 was *Ace* with secondary effects seen for *Dscam1* and *trpl*. Although mutations in *Ace* are a  
577 common mechanism of resistance to OPs (and carbamates), it has long been recognized that  
578 mutations in *Ace* that give insensitivity to one insecticide may provide little or no resistance to  
579 other OPs (or carbamates) (Oppenoorth 1985). However, the *Ace* mutations present in the DGRP

580 lines render the protein less sensitive to inhibition by azinphos-methyl oxon, the bioactivated form  
581 of azinphos-methyl (Menozzi *et al.* 2004). One possibility why *Ace* was not detected as a locus for  
582 resistance to azinphos-methyl would be if *Cyp6g1* was highly efficient at detoxification of this  
583 insecticide, such that the bioactivated form was not produced in lines that had this resistance allele.  
584 However, the *Ace* and *Cyp6g1* mutations would be expected to segregate, giving a signal for both  
585 mutations and making it unclear why this locus was not detected for azinphos-methyl resistance  
586 (Battlay *et al.* 2016).

587         DDT was widely used from 1946 until resistance problems became wide spread (about  
588 1960) and other more effective insecticides were introduced. DDT was banned by EPA in 1972.  
589 Organophosphates were introduced in the mid-1940s and became the most widely used class of  
590 insecticides from about 1955 – 1987. Pyrethroids were introduced about 1980 and rapidly rose to  
591 become the most widely used class of insecticides from about 1989-2000. Neonicotinoids  
592 (specifically imidacloprid) was registered for use in fruit about 1994 and have been the most  
593 widely used class of insecticides since about 2000. The DGRP lines were collected in 2003  
594 (Mackay *et al.* 2012). Thus, use of the DGRP lines to evaluate DDT resistance would be searching  
595 for signs of selection that would have ceased nearly 50 years ago. In the case of OPs and  
596 pyrethroids, the selection has been ongoing for over 50 and 30 years, respectively. In the case of  
597 neonicotinoids, the selection would have been for only about a decade. Based on this, we might  
598 expect that we would detect the strongest to weakest signals for parathion, followed by  
599 deltamethrin and then imidacloprid and/or DDT. Exceptions to this might occur if there was cross-  
600 resistance between one of these insecticides and what was used in the field. Given the different  
601 loci that were detected for parathion, deltamethrin and imidacloprid, suggests this is unlikely and  
602 indicates the detected loci were the result of OP or carbamate, pyrethroid and neonicotinoid

603 insecticides, respectively. However, *Cyp6g1* was detected for DDT, azinphos-methyl and  
604 imidacloprid resistance. Thus, the GWAS analysis for DDT may not represent what evolved in  
605 the population due to DDT use, but rather what evolved in the population over the last 40 years  
606 that conferred cross-resistance to DDT.

607 Altogether our study confirms that insecticides apply a strong selection pressure even on  
608 insects, like *D. melanogaster*, that are not the targeted pest and highlight that pesticide  
609 management should take into account the effect on the whole insect community. Furthermore, the  
610 fact that resistance can be buffered by the presence of the common endosymbiont *Wolbachia* and  
611 can evolve through changes in target site or in detoxification enzyme depending on the insecticides  
612 and on the insect species make evolution of resistance in those communities fairly unpredictable.  
613 However, resistance alleles were present in populations sampled throughout the world showing  
614 that even if unpredictable, evolution of resistance to insecticide is repeatable.

615

## 616 **Acknowledgements**

617 We thank Jean-Baptiste Ferdy and Fabrice Roux for thoughtful discussions and Pierre Solbes for  
618 support with the cluster. This project was supported by start-up funds (to NB). HS was supported  
619 by a fellowship from the China Scholarship Council (Grant No. 201406850044). DD was  
620 supported by the French Laboratory of Excellence project "TULIP" (ANR-10-LABX-41; ANR-  
621 11-IDEX-0002-02) and by the People Programme (Marie Curie Actions) of the European Union's  
622 Seventh Framework Programme (FP7/2007-2013) under REA grant agreement n. PCOFUND-  
623 GA-2013-609102, through the PRESTIGE programme coordinated by Campus France. HDK and  
624 IVC were supported by Presidential Life Science Fellowships from Cornell University.

625 Computations were performed on the EDB-Calc Cluster which uses a software developed by the  
626 Rocks(r) Cluster Group (San Diego Supercomputer Center, University of California, San Diego  
627 and its contributors), hosted by the laboratory "Evolution et Diversité Biologique" (EDB).

628

## 629 **References**

630 Achaleke J., Martin T., Ghogomu R. T., Vaissayre M., Brévault T., 2009 Esterase-mediated resistance to  
631 pyrethroids in field populations of *Helicoverpa armigera* (Lepidoptera: Noctuidae) from Central  
632 Africa. *Pest Manag. Sci.* 65: 1147–1154.

633 Amichot M., Tarés S., Brun-Barale A., Arthaud L., Bride J. M., *et al.*, 2004 Point mutations associated  
634 with insecticide resistance in the *Drosophila* cytochrome P450 *Cyp6a2* enable DDT metabolism.  
635 *Eur. J. Biochem.* 271: 1250–1257.

636 Battlay P., Schmidt J. M., Fournier-Level A., Robin C., 2016 Genomic and transcriptomic associations  
637 identify a new insecticide resistance phenotype for the selective sweep at the *Cyp6g1* locus of  
638 *Drosophila melanogaster*. *G3 Genes|Genomes|Genetics* 6: 2573–2581.

639 Berticat C., Rousset F., Raymond M., Berthomieu A., Weill M., 2002 High *Wolbachia* density in  
640 insecticide-resistant mosquitoes. *Proc Biol Sci* 269: 1413–1416.

641 Browning B. L., Browning S. R., 2016 Genotype imputation with millions of reference samples. *Am. J.*  
642 *Hum. Genet.* 98: 116–126.

643 Daborn P. J., Lumb C., Boey A., Wong W., Ffrench-Constant R. H., *et al.*, 2007 Evaluating the  
644 insecticide resistance potential of eight *Drosophila melanogaster* cytochrome P450 genes by  
645 transgenic over-expression. *Insect Biochem. Mol. Biol.* 37: 512–519.

646 Denecke S., Fusetto R., Martelli F., Giang A., Battlay P., *et al.*, 2017 Multiple P450s and variation in  
647 neuronal genes underpins the response to the insecticide imidacloprid in a population of *Drosophila*

- 648 *melanogaster*. Sci. Rep. 7: 11338.
- 649 Dong K., Du Y., Rinkevich F., Nomura Y., Xu P., *et al.*, 2014 Molecular biology of insect sodium  
650 channels and pyrethroid resistance. Insect Biochem. Mol. Biol. 50: 1–17.
- 651 French-Constant R. H., Roush R. T., Mortlock D., Dively G. P., 1990 Isolation of dieldrin resistance from  
652 field populations of *Drosophila melanogaster* (Diptera: Drosophilidae). J Econ Entomol 83: 1733–  
653 1737.
- 654 Fournier D., Mutero A., Pralavorio M., Bride J. M., 1993 *Drosophila* acetylcholinesterase: Mechanisms  
655 of resistance to organophosphates. Chem. Biol. Interact. 87: 233–238.
- 656 Garud N. R., Messer P. W., Buzbas E. O., Petrov D. A., 2015 Recent selective sweeps in North American  
657 *Drosophila melanogaster* show signatures of soft sweeps. PLoS Genet. 11: e1005004.
- 658 Good R. T., Gramzow L., Battlay P., Sztal T., Batterham P., *et al.*, 2014 The molecular evolution of  
659 cytochrome P450 genes within and between *Drosophila* species. Genome Biol. Evol. 6: 1118–34.
- 660 Grenier J. K., Arguello J. R., Moreira M. C., Gottipati S., Mohammed J., *et al.*, 2015 Global diversity  
661 lines—A five-continent reference panel of sequenced *Drosophila melanogaster* strains. G3  
662 Genes|Genomes|Genetics 5: 593–603.
- 663 Gunning R. V., Moores G. D., 2001 Insensitive acetylcholinesterase as sites for resistance to  
664 organophosphates and carbamates in insects: Insensitive acetylcholinesterase confers resistance in  
665 Lepidoptera. Biochem. Sites Insectic. Action Resist.: 221–238.
- 666 Huang W., Massouras A., Inoue Y., Peiffer J., Ràmia M., *et al.*, 2014 Natural variation in genome  
667 architecture among 205 *Drosophila melanogaster* Genetic Reference Panel lines. Genome Res. 24:  
668 1193–1208.
- 669 Huang W., Carbone M. A., Magwire M. M., Peiffer J. A., Lyman R. F., *et al.*, 2015 Genetic basis of  
670 transcriptome diversity in *Drosophila melanogaster*. Proc. Natl. Acad. Sci. 112: E6010–E6019.

- 671 Karasov T., Messer P. W., Petrov D. A., 2010 Evidence that adaptation in *Drosophila* is not limited by  
672 mutation at single sites (HS Malik, Ed.). *PLoS Genet.* 6: 1–10.
- 673 Kono Y., Tomita T., 2006 Amino acid substitutions conferring insecticide insensitivity in *Ace*-paralogous  
674 acetylcholinesterase. *Pestic. Biochem. Physiol.* 85: 123–132.
- 675 Liu N., Scott J. G., 1998 Increased transcription of CYP6D1 causes cytochrome P450-mediated  
676 insecticide resistance in house fly. *Insect Biochem. Mol. Biol.* 28: 531–535.
- 677 Mackay T. F. C., Richards S., Stone E. a, Barbadilla A., Ayroles J. F., *et al.*, 2012 The *Drosophila*  
678 *melanogaster* Genetic Reference Panel. *Nature* 482: 173–8.
- 679 Meister R. T., Sine C., 2014 *Crop protection handbook*. Meister media Worldwide, Willoughby, OH.
- 680 Menozzi P., Shi M. A., Lougarre A., Tang Z. H., Fournier D., 2004 Mutations of acetylcholinesterase  
681 which confer insecticide resistance in *Drosophila melanogaster* populations. *BMC Evol. Biol.* 7: 1–  
682 7.
- 683 Messer P. W., Petrov D. A., 2013 Population genomics of rapid adaptation by soft selective sweeps.  
684 *Trends Ecol. Evol.* 28: 659–669.
- 685 Miles A., Harding N. J., Botta G., Clarkson C., Antao T., *et al.*, 2016 Natural diversity of the malaria  
686 vector *Anopheles gambiae*. bioRxiv.
- 687 Morozova T. V., Huang W., Pray V. A., Whitham T., Anholt R. R. H., *et al.*, 2015 Polymorphisms in  
688 early neurodevelopmental genes affect natural variation in alcohol sensitivity in adult *Drosophila*.  
689 *BMC Genomics* 16: 865.
- 690 Newcomb R. D., Campbell P. M., Ollis D. L., Cheah E., Russell R. J., *et al.*, 1997 A single amino acid  
691 substitution converts a carboxylesterase to an organophosphorus hydrolase and confers insecticide  
692 resistance on a blowfly. *Proc. Natl. Acad. Sci. U. S. A.* 94: 7464–7468.
- 693 Oppenoorth F. J., 1985 Biochemistry and genetics of insecticide resistance. In: *Comprehensive Insect*

- 694        *Physiology, Biochemistry, and Pharmacology*, Pergamon Press, Oxford, pp. 731–774.
- 695    Paradis E., Claude J., Strimmer K., 2004 APE: Analyses of phylogenetics and evolution in R language.  
696        *Bioinformatics* 20: 289–290.
- 697    Pittendrigh B., Reenan R., Ffrench-Constant R. H., Ganetzky B., 1997 Point mutations in the *Drosophila*  
698        sodium channel gene para associated with resistance to DDT and pyrethroid insecticides. *Mol. Gen.*  
699        *Genet.* 256: 602–10.
- 700    Rinkevich F. D., Du Y., Tolinski J., Ueda A., Wu C. F., *et al.*, 2015 Distinct roles of the DmNavand  
701        DSC1 channels in the action of DDT and pyrethroids. *Neurotoxicology* 47: 99–106.
- 702    Saitou N., Nei M., 1987 The neighbour-joining method: a new method for reconstructing phylogenetic  
703        trees. *Mol Biol Evo* 4: 406–425.
- 704    Schmidt J. M., Battlay P., Gledhill-Smith R. S., Good R. T., Lumb C., *et al.*, 2017 Insights into DDT  
705        resistance from the *Drosophila melanogaster* Genetic Reference Panel. *Genetics* 207:  
706        genetics.300310.2017.
- 707    Scott J. G., 1999 Cytochromes P450 and insecticide resistance. *Insect Biochem. Mol. Biol.* 29: 757–777.
- 708    Scott J. G., Leichter C. A., Rinkevihc F. D., Harris S. A., Su C., *et al.*, 2013 Insecticide resistance in  
709        house flies from the United States: Resistance levels and frequency of pyrethroid resistance alleles.  
710        *Pestic. Biochem. Physiol.* 107: 377–384.
- 711    Scott J. G., 2017 Evolution of resistance to pyrethroid insecticides in *Musca domestica*. *Pest Manag. Sci.*  
712        73: 716–722.
- 713    Sun H., Buchon N., Scott J. G., 2017 *Mdr65* decreases toxicity of multiple insecticides in *Drosophila*  
714        *melanogaster*. *Insect Biochem. Mol. Biol.* 89: 11–16.
- 715    Vanolst L., 2005 Toutatis, a TIP5-related protein, positively regulates Pannier function during *Drosophila*  
716        neural development. *Development* 132: 4327–4338.



- 717 Ware G. W., Whitacre D. M., 2004 *The pesticide book* (MeisterPro, Ed.). Willoughby, OH.
- 718 Weber A. L., Khan G. F., Magwire M. M., Tabor C. L., Mackay T. F., *et al.*, 2012 Genome-wide  
719 association analysis of oxidative stress resistance in *Drosophila melanogaster*. PLoS One 7: e34745.
- 720 Weill M., Fort P., Berthomieu A., Dubois M. P., Pasteur N., *et al.*, 2002 A novel acetylcholinesterase  
721 gene in mosquitoes codes for the insecticide target and is non-homologous to the *Ace* gene  
722 *Drosophila*. Proc. R. Soc. B Biol. Sci. 269: 2007–2016.
- 723 Weill M., Berthomieu A., Berticat C., Lutfalla G., Nègre V., *et al.*, 2004 Insecticide resistance: A silent  
724 base prediction. Curr. Biol. 14: 552–553.

## 725 **Tables**

726 Table 1: Genetic variation and heritability of susceptibility to two insecticides

727

## 728 **FIGURE LEGENDS**

### 729 **Figure 1**

730 **A-** Ranked mean ( $\pm$  standard error) of male proportion surviving 48 h post-exposure to *i*) parathion  
731 and *ii*) deltamethrin. **B-** Correlation between resistance to parathion and resistance to deltamethrin.  
732 The resistance to one insecticide was not correlated to the resistance to the other insecticide.  
733 Analysis of correlation was done with Spearman correlation test.

### 734 **Figure 2**

735 **A-** Manhattan plot describing the results of the main GWAS on parathion resistance (including  
736 194 DGRP lines). Light green dots represent the SNPs with a p-value below a  $10^{-5}$  threshold. Loci  
737 in the *Ace* gene were the main loci responsible for the variation in resistance to parathion exposure.  
738 **B-** Survival curves (in hours) of lines variants for the validated candidate genes for resistance to  
739 parathion. *i*) Variation in *Ace* (mutation F368Y) in position 3R:13,243,332 affects the resistance  
740 to parathion. *ii*) Variation in *Dscam1* affects the resistance to parathion, but only in lines that do  
741 not carry *Wolbachia* (Survival analysis with lognormal distribution: interaction SNP and  
742 *Wolbachia*: deviance= 455.39,  $p < 0.0001$ ). *iii*) Variation in *trpl* affects the resistance to parathion,  
743 but only in lines that do not carry *Wolbachia* (Survival analysis with lognormal distribution:  
744 interaction SNP and *Wolbachia*: deviance= 735.69,  $p < 0.0001$ ). **C-** Validation of the candidate  
745 genes of our GWAS. White dots represent the wildtype genotypes, black dots the loss-of-function

746 mutants, blue dots the downregulation and red dots the upregulation of the genes. Non-significant  
747 effects are indicated by “ns”, p-values below 0.001 are indicated by \*\*\*. Details of the statistics  
748 are summarized in Table S6 and S7.

### 749 **Figure 3**

750 **A-** Manhattan plot describing the results of the main GWAS on deltamethrin resistance (including  
751 195 DGRP lines). Light green dots represent the SNPs with a p-value below a  $10^{-5}$  threshold. The  
752 loci mainly responsible for the variation in resistance to deltamethrin exposure were located in  
753 the *Cyp6a23* gene or its direct proximity, within the *Cyp6a* cluster. Inset graph represents a  
754 magnification of the results and suggests that *Cyp6a23* and *Cyp6a17* were the most likely  
755 candidates. **B-** Mean survival of lines variants for the validated candidate genes *Cyp6a23* for  
756 resistance to deltamethrin. Colors represent five replicated experiments. **C-** *Cyp6a23* is part of a  
757 cluster of genes belonging to the cytochrome P450 family. The phylogeny represents the already  
758 suggested hypothesis that *Cyp6a23* and *Cyp6a17* are two neighboring paralogous genes issued  
759 from a recent duplication. **D-** Validation of the candidate genes of our GWAS. White dots represent  
760 the wildtype genotypes, black dots the loss-of-function mutants and blue dots the downregulation  
761 of the genes. Non-significant effects are indicated by “ns”, p-values below 0.01 are indicated by  
762 \*\* and p-values below 0.001 are indicated by \*\*\*. Details of the statistics are summarized in Table  
763 S6 and S7.

### 764 **Figure 4**

765 **A-** Genome-wide H12 scan for all autosomal SNPs in the DGRP data, using window sizes of 800  
766 segregating sites centered around each focal SNP. Red arrows indicate the positions of our  
767 candidate loci. The lower panel shows neighbor-joining trees for selected genomic windows of

768 length 200 kbp from each autosomal arm: (i) a random window on 2R, (ii) window centered on  
769 the *Cyp6a23* locus, (iii) a random window on 3L, and (iv) a window centered on the *Ace* locus.  
770 The coloring of the leaf nodes in (ii) and (iv) specifies the particular combination of resistance  
771 mutations each haplotype carries at the respective locus (e.g. 011 indicating presence of the second  
772 and third resistance mutation at *Ace*, while 000 indicates a haplotype with none of the three  
773 resistance mutations). **B-** H12 scan around the *Ace* locus after splitting the DGRP data into two  
774 subsets of genomes that either carry at least one of the three resistance mutations (resistant  
775 haplotypes) or do not carry any such mutation (susceptible haplotypes). The latter group was  
776 down-sampled so that both subsamples comprised the same number of genomes ( $n = 90$ ). **C-**  
777 Frequencies of resistance mutations in the DGRP data and the five-continent reference panel of  
778 the global diversity lines (GDL) (Grenier *et al.* 2015). \*In Zimbabwe, at the first *Cyp6a23*  
779 resistance locus an alternative allele is present in ~21.4% of the GDL strains that is not found in  
780 the DGRP, and for which we therefore do not know whether it is a resistant or susceptible allele.  
781 \*\*At the *CG7627* locus, the resistant allele is the reference allele and the susceptible allele is an  
782 insertion of a single base pair. We did not observe this insertion in any of the GDL lines (although  
783 it could be possible that this indel exists in the panel but was not called in the data).

784 **Supplementary tables**

785 **Table S1**

786 List of *D. melanogaster* genotypes. Stock number refers to the Bloomington or VDRC stock center  
787 numbers.

788 **Table S2**

789 Results of GWAS of parathion resistance.

790 **Table S3**

791 Results of nested GWAS of parathion resistance.

792 **Table S4**

793 Results of GWAS of deltamethrin resistance.

794 **Table S5**

795 Results of nested GWAS of deltamethrin resistance.

796 **Table S6**

797 Details of the validation (see Figure 2C and 3D). Results from general linear hypothesis test (glht)  
798 with Tukey post Hoc pairwise comparisons, to ascertain differences between pairs of treatments  
799 (package *multcomp* in R) after a generalized linear model with a quasibinomial distribution of the  
800 residuals.

801 **Table S7**

802 Details of the validation (see Figure 2C and 3D). Results from generalized linear model with a  
803 quasibinomial distribution of the residuals.

804 **Table S8**

805 Raw phenotypic data for resistance to Parathion.

806 **Table S9**

807 Raw phenotypic data for resistance to Deltamethrin.

## 808 **Supplementary figure legends**

### 809 **Figure S1**

810 Difference in survival to insecticide exposure between the DGRP lines carrying *Wolbachia* and  
811 those that do not carry the endosymbiont. Lines carrying *Wolbachia* did not survive better than  
812 those without *Wolbachia* (**A**: Survival to parathion over time; **B**: Survival to deltamethrin at 48 h).  
813 Non-significant effects are indicated by “ns”.

### 814 **Figure S2**

815 Correlation between the resistance to insecticide (i.e. proportion surviving after 48 h of parathion  
816 or deltamethrin exposure) and other abiotic stresses: Paraquat (**A** and **B**), Starvation (**C** and **D**) and  
817 alcohol (alcohol sensitivity is measured by measuring elution time) (**E** and **F**). Measurements of  
818 resistance to other stresses were performed in other studies (see details in methods). Analysis of  
819 correlation was done with Spearman correlation test. A blue line represents the significant  
820 correlation between the two traits.

### 821 **Figure S3**

822 Genetic correlation between 10 lines amongst the most sensitive (red) and 10 lines the amongst  
823 most resistant (green) to **A**) parathion exposure and **B**) deltamethrin exposure. The grey gradient  
824 represents the strength of the genetic correlation with black being “genetically identical”.

### 825 **Figure S4**

826 Manhattan plots with the package *Chromplot* in R showing precisely the peak of p-values along  
827 the genome for the complete GWAS (shown to the left of the chromosome) and the nested GWAS

828 (shown to the right of the chromosome) for resistance to parathion. Names of genes are manually  
829 selected candidates. The full datasets can be found in tables S2 and S3.

830 **Figure S5**

831 Mean survival upon parathion exposure of lines variants at the *Ace* loci. **A-** Variation in *Ace*  
832 (mutation G303A) in position 3R:13,243,686 affects the resistance to parathion. **B-** Variation in  
833 *Ace* (mutation I199V) in position 3R:13,243,999 affects the resistance to parathion.

834 **Figure S6**

835 Correlation between the resistance to insecticide (i.e. proportion of survival 48 h upon parathion  
836 or deltamethrin exposure) and the constitutive expression of validated genes. Experimental  
837 measurements of gene expression were measured in other studies (see details in methods).  
838 Analysis of correlation was done with Spearman correlation test. A blue line represents represent  
839 the significant correlation between the two traits.

840 **Figure S7**

841 Manhattan plots with the package *Chromplot* in R showing precisely the peak of p-values along  
842 the genome for the complete GWAS (shown to the left of the chromosome) and the nested GWAS  
843 (shown to the right of the chromosome) for resistance to deltamethrin. Names of genes are  
844 manually selected candidates. The full datasets can be found in tables S4 and S5.

845 **Figure S8**

846 Mean survival upon exposure to deltamethrin of lines variants for the SNP in position  
847 2R:14,876,857 belonging to the validated candidate gene *Cyp6a23* (**A**) and for the SNP belonging  
848 to the validated candidate gene *CG7627* (**B**). Colors represent five replicated experiments.



Figure 1

A

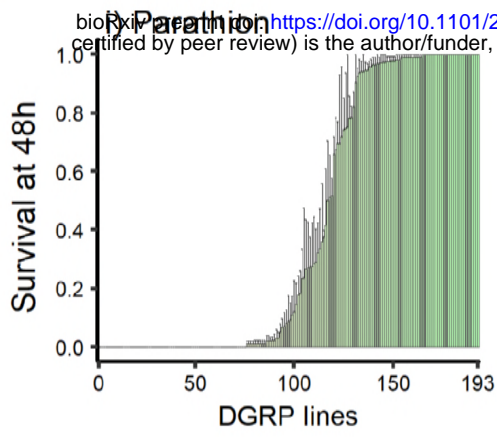

B

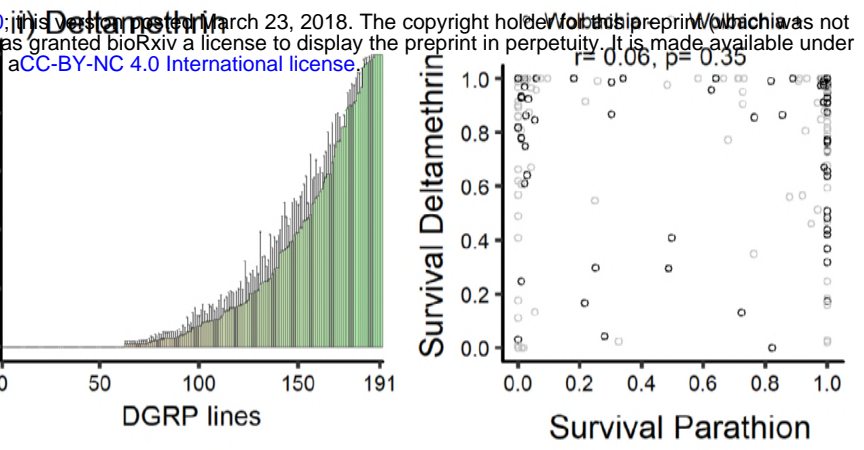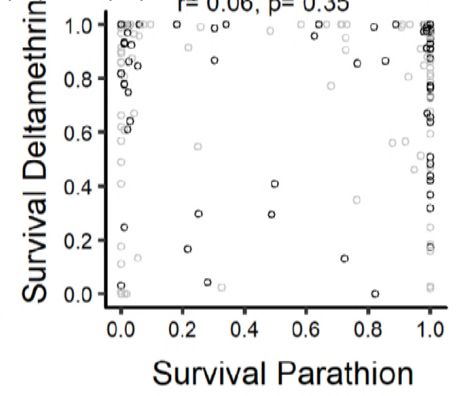

bioRxiv preprint doi: <https://doi.org/10.1101/287250>; this version posted March 23, 2018. The copyright holder for this preprint (which was not certified by peer review) is the author/funder, who has granted bioRxiv a license to display the preprint in perpetuity. It is made available under aCC-BY-NC 4.0 International license.

Figure 2

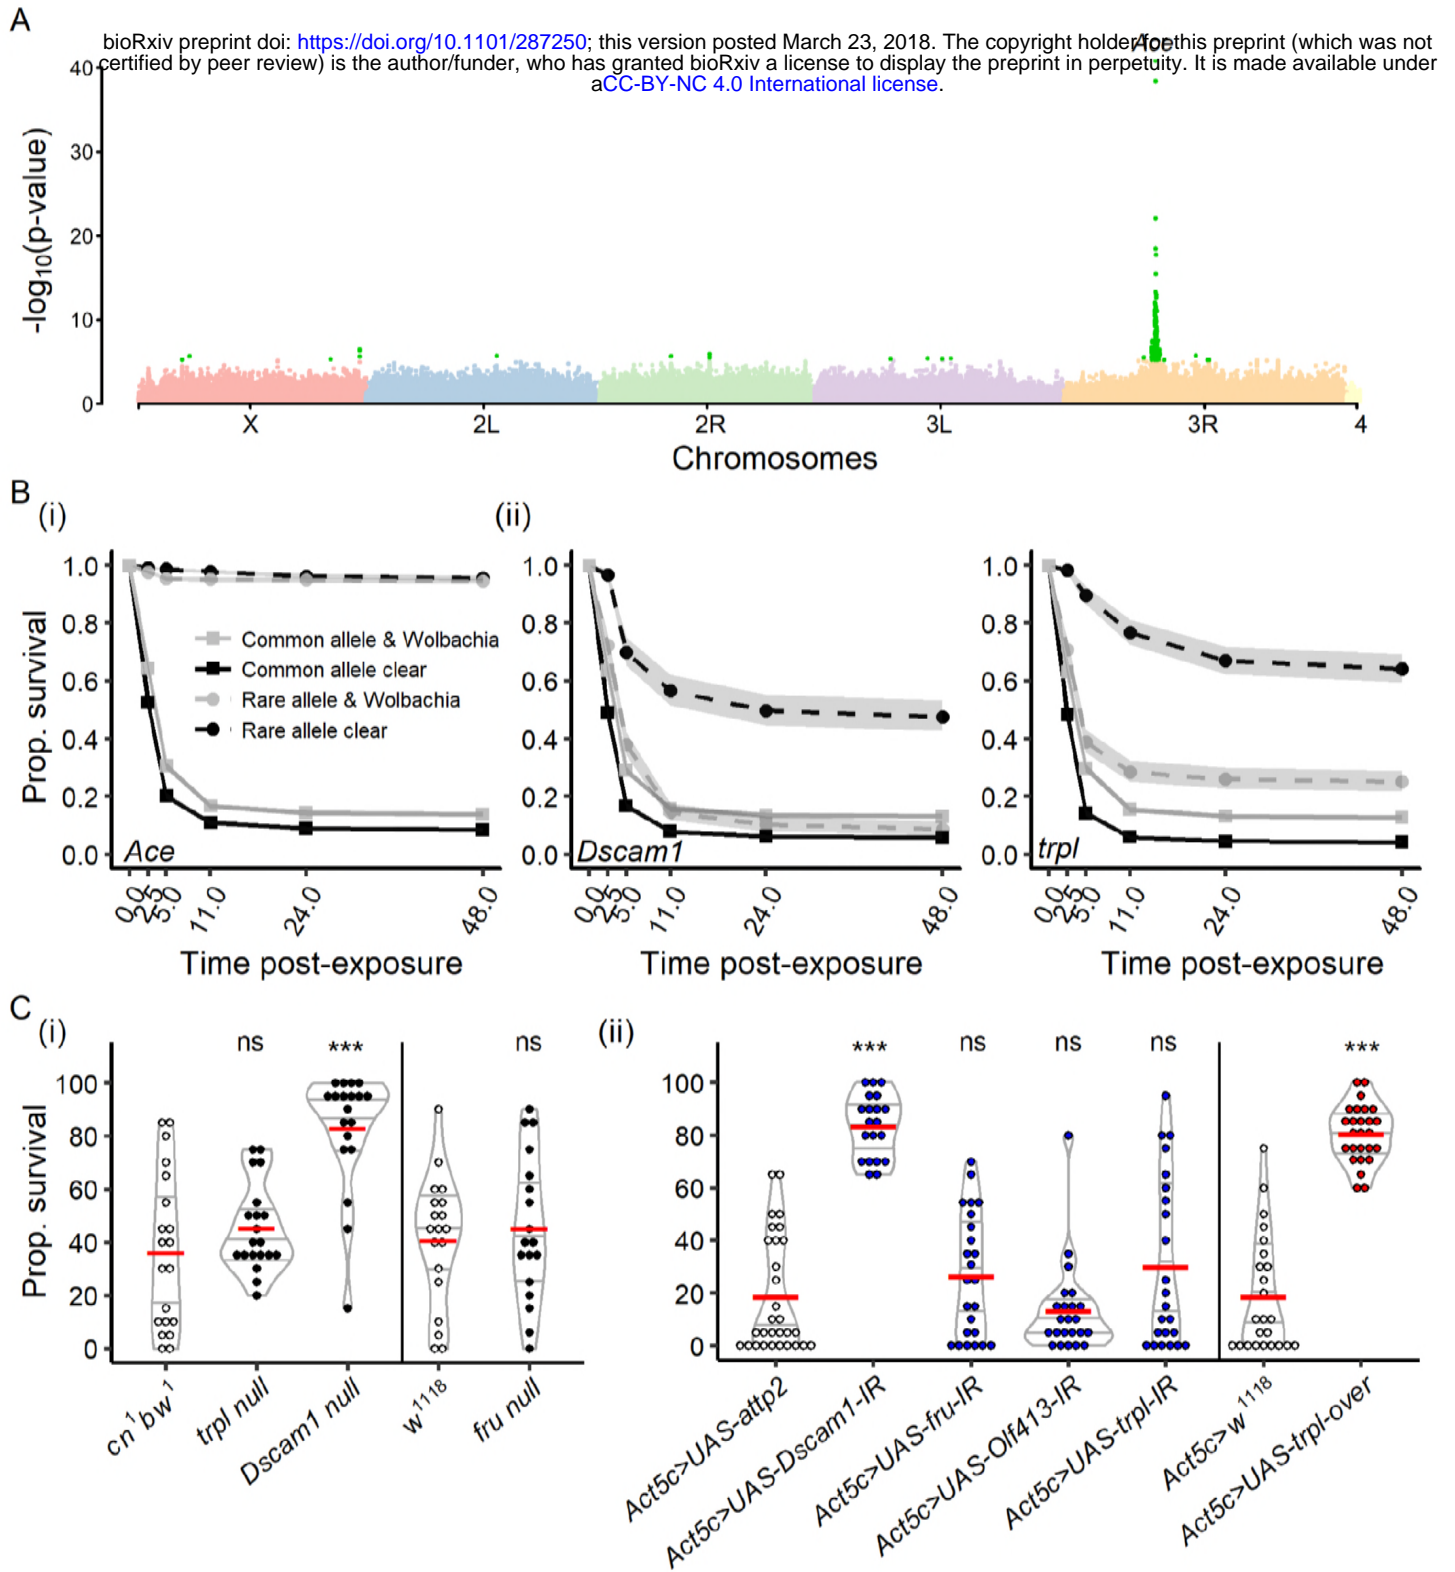

Figure 3

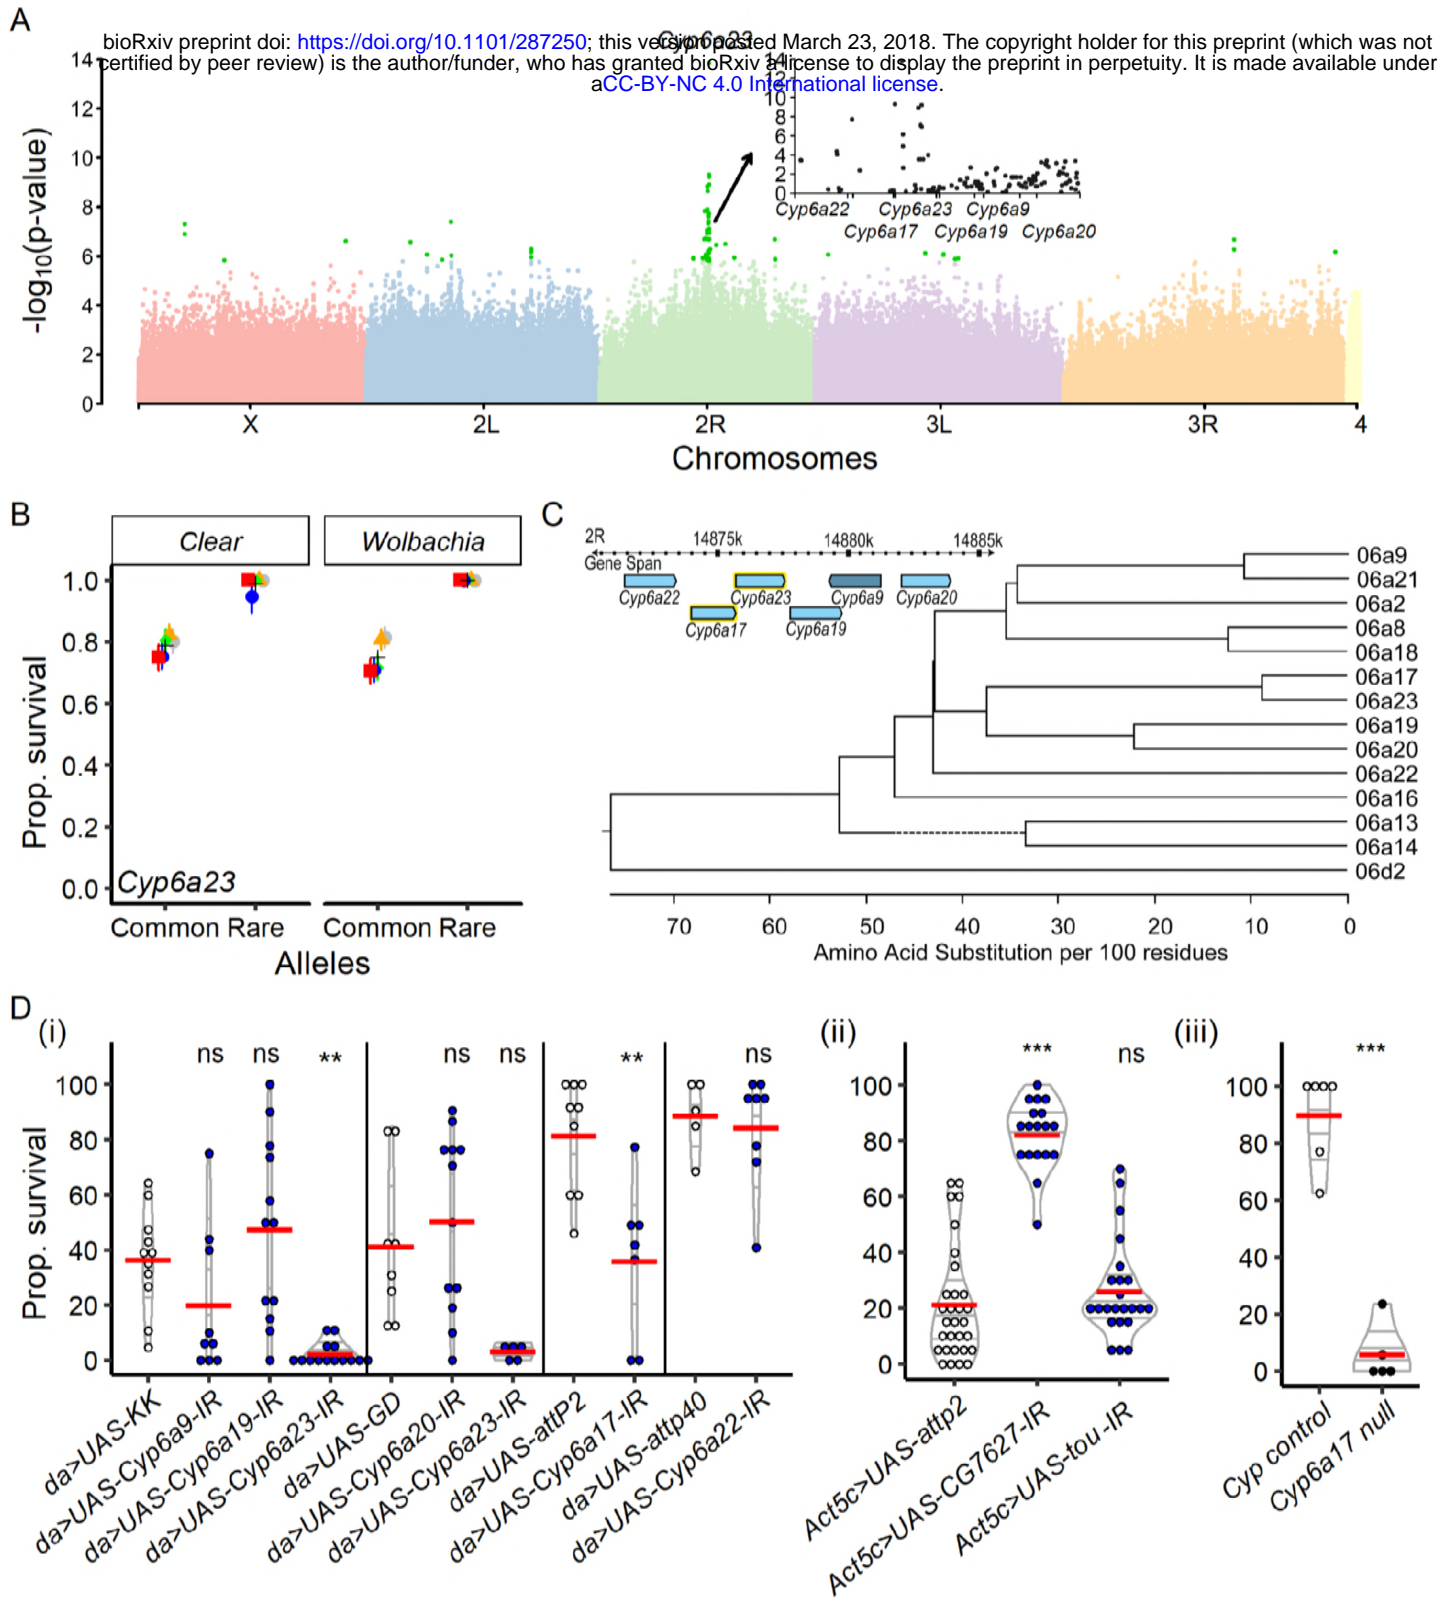

**Figure 4**
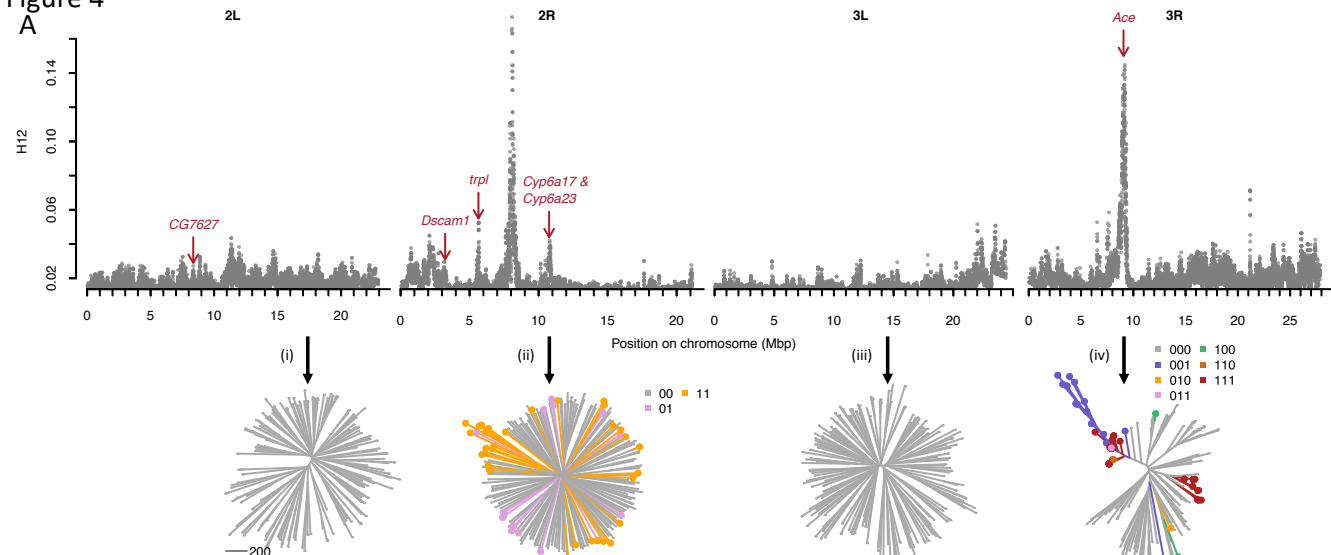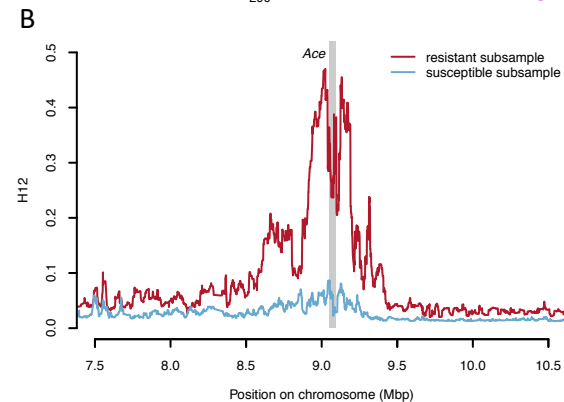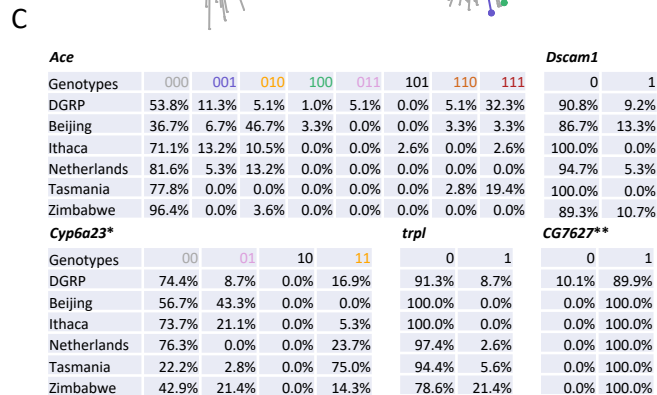

| <b>Insecticides</b> | <b><i>N</i> flies</b> | <b><i>N</i> lines</b> | <b><math>V_e</math></b> | <b><math>V_g</math></b> | <b><math>h^2</math></b> |
|---------------------|-----------------------|-----------------------|-------------------------|-------------------------|-------------------------|
| <b>parathion</b>    | 194                   | 16.568                | 6.04                    | 43.83                   | 0.88                    |
| <b>deltamethrin</b> | 195                   | 16.684                | 4.4                     | 7.07                    | 0.61                    |
